# Supplementary material for: Chemotherapy promotes tumour cell hybridization in vivo
Source: Springer Nature journal article supplement (doi:10.1007/s13277-015-4337-7), 2015-11-05
Supplement: MOESM1 [file 9260912]

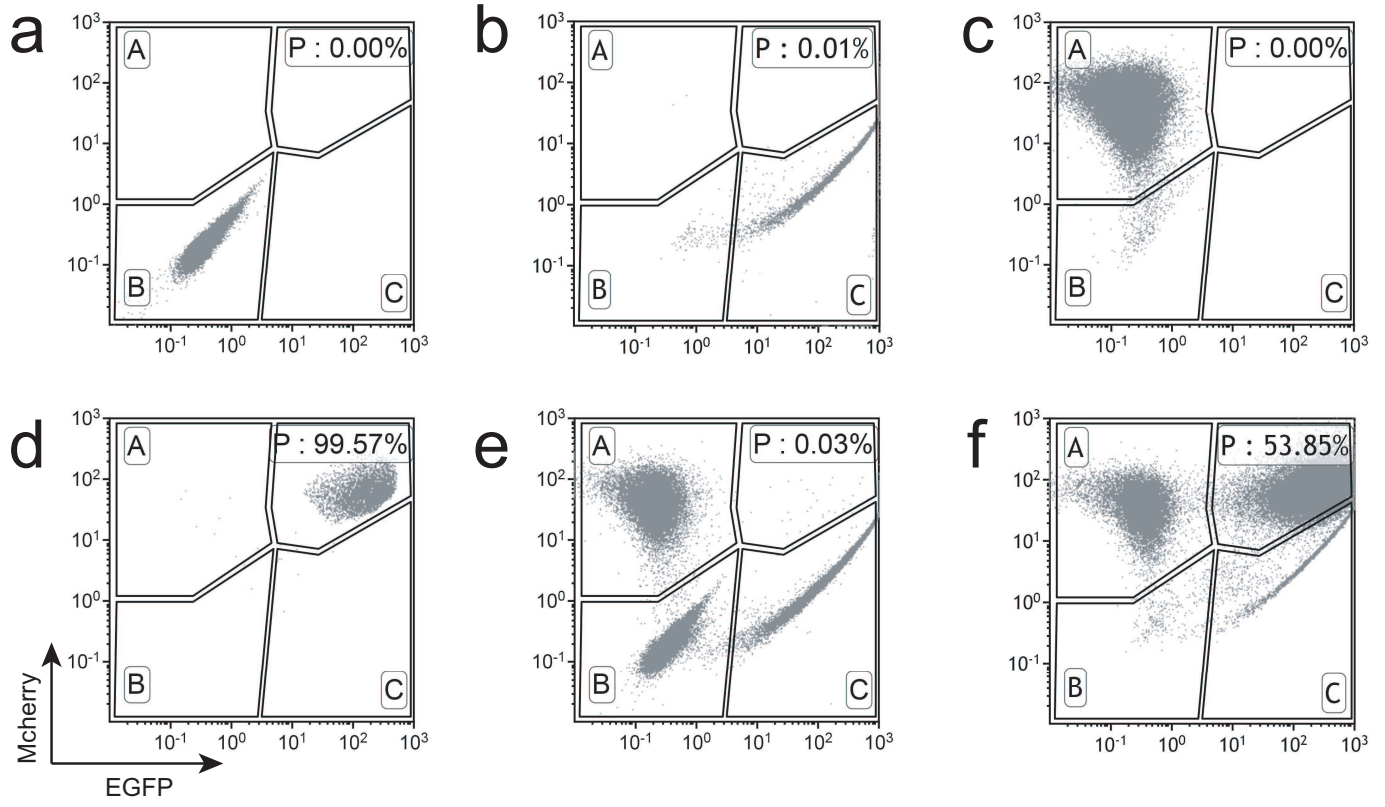

Figure S1: Control gates for FACS
