# Supplementary material for: Chemotherapy promotes tumour cell hybridization in vivo
Source: Springer Nature journal article supplement (doi:10.1007/s13277-015-4337-7), 2015-11-05
Supplement: MOESM2 [file 9260912]

Table S1: Tumour growth rate between chemotherapy and non-chemotherapy groups.

| Tumour growth rate (mm <sup>3</sup> /day) | 5-15 Days      | 15-18 Days <sup>#</sup> | 18-21 Days     |
|-------------------------------------------|----------------|-------------------------|----------------|
| Non-chemotherapy group                    | 216.90 ± 44.44 | 270.08 ± 59.55          | 289.32 ± 72.34 |
| Chemotherapy group                        | 167.30 ± 40.69 | 75.98 ± 39.52           | 244.37 ± 68.70 |

<sup>#</sup>Days of drug injection,  $p < 0.05$
